# Supplementary material for: Impacts of Air Pollution on Health and Cost of Illness in Jakarta, Indonesia
Source: Int J Environ Res Public Health. 2023 Feb 7;20(4):2916. doi: 10.3390/ijerph20042916 (PMC9963985; doi:10.3390/ijerph20042916)
Supplement: Supplementary file 1 [file ijerph-20-02916-s001.zip › ijerph-2184837-supplementary.pdf]

# Impacts of Air Pollution on Health and Cost of Illness in Jakarta, Indonesia

Ginanjari Syuhada<sup>1</sup>, Adhadian Akbar<sup>2</sup>, Donny Hardiawan<sup>2</sup>, Vivian Pun<sup>1</sup>, Adi Darmawan<sup>3</sup>, Sri Hayyu Alynda Heryati<sup>3</sup>, Adiatma Yudistira Manogar Siregar<sup>2</sup>, Ririn Radiawati Kusuma<sup>1</sup>, Raden Driejana<sup>4</sup>, Vijendra Ingole<sup>5</sup>, Daniel Kass<sup>5</sup>, Sumi Mehta<sup>5,\*</sup>

<sup>1</sup> Environmental Health Division, Vital Strategies, Singapore; [gsyuhada@vitalstrategies.org](mailto:gsyuhada@vitalstrategies.org)

<sup>2</sup> Center for Economics and Development Studies, Department of Economics, Faculty of Economics and Business, Universitas Padjadjaran, Bandung, Indonesia; [adiatma.siregar@unpad.ac.id](mailto:adiatma.siregar@unpad.ac.id)

<sup>3</sup> Environmental Agency of DKI Jakarta Province, Jakarta, Indonesia; [darmawanadi@gmail.com](mailto:darmawanadi@gmail.com)

<sup>4</sup> Faculty of Civil and Environment Engineering, Institut Teknologi Bandung, Bandung, Indonesia; [driejana@tl.itb.ac.id](mailto:driejana@tl.itb.ac.id)

<sup>5</sup> Environmental Health Division, Vital Strategies, New York, USA; [smehta@vitalstrategies.org](mailto:smehta@vitalstrategies.org)

\* Correspondence: [smehta@vitalstrategies.org](mailto:smehta@vitalstrategies.org)

## SUPPLEMENTARY

### SUPPLEMENTARY 1 – Detailed Definition of Health Outcomes

The following table describes the definition of health outcomes assessed in this study. For the cause-specific mortality, the disease groups are in accordance with the ICD-10 categorization used in the GBD 2019 Study.

Table S1. Summary of health outcomes and their definition included in the study

| Outcome                          | Definition<br>(ICD-10 or otherwise specified)                                             |
|----------------------------------|-------------------------------------------------------------------------------------------|
| <i>Children health outcomes</i>  |                                                                                           |
| Infant mortality                 | All cause                                                                                 |
| Stunting                         | Height for age less than two standard deviations of the WHO Child Growth Standards median |
| <i>Adverse birth outcomes</i>    |                                                                                           |
| Low birth weight, at term        | Weight <2,500 g at birth after 37 weeks of gestation                                      |
| Preterm birth                    | Birth at the gestation of <37 weeks                                                       |
| <i>Cause-specific mortality</i>  |                                                                                           |
| Ischemic heart disease           | I20–I25                                                                                   |
| Cerebrovascular disease (stroke) | I60–I63, I65–I67, I69.0–I69.3                                                             |

Chronic obstructive pulmonary disease (COPD) J40–J44, J47

---

Type 2 diabetes mellitus E10–E13

---

Trachea, bronchus, and lung cancer C33–C34. D02.1, D02.2, D38.1

---

Lower respiratory infections J09–J15.8, J16–J16.9, J20–J21.9, P23–P23.9, and Z25.1

---

## SUPPLEMENTARY 2 – District-specific health burdens

For district-specific health burdens, we found that:

- West Jakarta has the highest PM<sub>2.5</sub> and O<sub>3</sub> concentrations based on the air quality data from the Environmental Agency (DLH);
- Central Jakarta has the highest rates of adverse health outcomes associated with long term exposure to PM<sub>2.5</sub> pollution;
- South Jakarta has the highest rate of COPD mortality in the population over 25 associated with long term exposure to O<sub>3</sub> pollution;
- East Jakarta has the highest health burdens (in magnitude) associated with short-term exposure to air pollution, followed by West and South Jakarta.

The following tables describe more detailed information regarding each district-specific health outcome.

Table S2. Infant deaths and stunting cases attributable to long-term exposure to PM<sub>2.5</sub> in Jakarta districts

| District        | Annual average of PM <sub>2.5</sub> (µg/m <sup>3</sup> ) | Infant deaths                                     |                             | Stunting                                          |                                  |
|-----------------|----------------------------------------------------------|---------------------------------------------------|-----------------------------|---------------------------------------------------|----------------------------------|
|                 |                                                          | Number of cases attributable to PM <sub>2.5</sub> | Rate (per 1000 live births) | Number of cases attributable to PM <sub>2.5</sub> | Rate (per 1000 children under 5) |
| Central Jakarta | 51                                                       | 80                                                | 6                           | 1,072                                             | 16                               |
| North Jakarta   | 44                                                       | 64                                                | 3                           | 506                                               | 3                                |
| West Jakarta    | 61                                                       | 104                                               | 3                           | 1,561                                             | 7                                |
| South Jakarta   | 50                                                       | 28                                                | 1                           | 877                                               | 5                                |
| East Jakarta    | 53                                                       | 53                                                | 6                           | 2,233                                             | 9                                |

Table S3. Adverse birth outcomes and cause-specific deaths attributable to long-term exposure to PM<sub>2.5</sub> in Jakarta districts

| District        | Annual average of PM <sub>2.5</sub> (µg/m <sup>3</sup> ) | Adverse birth outcomes*                           |                             | Cause-specific deaths^                            |                               |
|-----------------|----------------------------------------------------------|---------------------------------------------------|-----------------------------|---------------------------------------------------|-------------------------------|
|                 |                                                          | Number of cases attributable to PM <sub>2.5</sub> | Rate (per 1000 live births) | Number of cases attributable to PM <sub>2.5</sub> | Rate (per 100,000 population) |
| Central Jakarta | 51                                                       | 126                                               | 9                           | 1,112                                             | 98                            |
| North Jakarta   | 44                                                       | 225                                               | 9                           | 1,410                                             | 78                            |
| West Jakarta    | 61                                                       | 125                                               | 4                           | 2,327                                             | 92                            |
| South Jakarta   | 50                                                       | 94                                                | 3                           | 2,201                                             | 94                            |
| East Jakarta    | 53                                                       | 154                                               | 4                           | 2,641                                             | 84                            |

\*Combining newborns with low birth weight and babies born preterm

^Total mortality includes deaths from ischemic heart disease, stroke, COPD, type 2 diabetes, lower respiratory infections, and lung cancer.

Table S4. COPD mortality attributable to long-term exposure to Ozone in Jakarta districts

| District        | Annual mean of daily max 8h-average (µg/m <sup>3</sup> ) | COPD Mortality                        |                                        |
|-----------------|----------------------------------------------------------|---------------------------------------|----------------------------------------|
|                 |                                                          | Number of cases attributable to Ozone | Rate (per 100,000 population aged 25+) |
| Central Jakarta | 88                                                       | 15                                    | 2                                      |
| North Jakarta   | 125                                                      | 46                                    | 4                                      |
| West Jakarta    | 127                                                      | 70                                    | 5                                      |
| South Jakarta   | 154                                                      | 100                                   | 7                                      |
| East Jakarta    | 127                                                      | 80                                    | 4                                      |

1 Table S5. Numbers of hospital admissions attributable to short-term exposure to PM<sub>2.5</sub> and Ozone in Jakarta districts

| District        | Hospital admissions attributable to PM <sub>2.5</sub> |                                     | Hospital admissions attributable to Ozone |                                                 |
|-----------------|-------------------------------------------------------|-------------------------------------|-------------------------------------------|-------------------------------------------------|
|                 | Number of hospitalizations                            | Rate<br>(per 100,000<br>population) | Number of hospitalizations                | Rate<br>(per 100,000<br>population aged<br>65+) |
| Central Jakarta | 635<br>(93% due to CVD; 7% due to RESP)               | 56                                  | 84<br>(90% due to CVD; 10% due to RESP)   | 143                                             |
| North Jakarta   | 465<br>(82% due to CVD; 18% due to RESP)              | 26                                  | 104<br>(78% due to CVD; 22% due to RESP)  | 140                                             |
| West Jakarta    | 820<br>(85% due to CVD; 15% due to RESP)              | 33                                  | 444<br>(92% due to CVD; 8% due to RESP)   | 405                                             |
| South Jakarta   | 322<br>(79% due to CVD; 21% due to RESP)              | 14                                  | 154<br>(95% due to CVD; 5% due to RESP)   | 136                                             |
| East Jakarta    | 1,327<br>(88% due to CVD; 12% due to RESP)            | 42                                  | 414<br>(72% due to CVD; 28% due to RESP)  | 326                                             |

CVD: Cardiovascular diseases;

RESP: Respiratory diseases

2

3

4

5

6 SUPPLEMENTARY 3 – Characterizing uncertainties in the health burdens

7 The following tables describe the lower and upper bounds of confidence intervals from each health burden calculated in this health impact assessment study.

8 Table S6. Lower- and upper-bound of health outcomes attributable to long-term exposure to air pollution

| Health outcomes                                              | DKI Jakarta |             | Central Jakarta |             | North Jakarta |             | West Jakarta |             | South Jakarta |             | East Jakarta |             |
|--------------------------------------------------------------|-------------|-------------|-----------------|-------------|---------------|-------------|--------------|-------------|---------------|-------------|--------------|-------------|
|                                                              | Lower bound | Upper bound | Lower bound     | Upper bound | Lower bound   | Upper bound | Lower bound  | Upper bound | Lower bound   | Upper bound | Lower bound  | Upper bound |
| Associated with PM2.5<br><i>Adverse outcomes in children</i> |             |             |                 |             |               |             |              |             |               |             |              |             |
| Infant deaths                                                | 165         | 450         | 40              | 111         | 32            | 90          | 54           | 141         | 14            | 38          | 27           | 73          |
| Stunting                                                     | 3,987       | 7,673       | 694             | 1,339       | 319           | 646         | 1,041        | 1,900       | 565           | 1,098       | 1,452        | 2,777       |
| Low birth weight                                             | 302         | 926         | 55              | 169         | 92            | 304         | 55           | 156         | 40            | 123         | 50           | 153         |
| Preterm births                                               | 88          | 585         | 3               | 23          | 12            | 84          | 9            | 59          | 6             | 38          | 58           | 380         |
| <i>Mortality</i>                                             | 7,753       | 11,404      | 889             | 1,312       | 1,109         | 1,684       | 1,890        | 2,716       | 1,755         | 2,603       | 2,119        | 3,104       |
| Associated with Ozone<br><i>Mortality due to COPD</i>        | 244         | 675         | 8               | 24          | 24            | 70          | 37           | 108         | 54            | 150         | 42           | 124         |

9 Table S7. Lower and upper bounds of total hospital admissions attributable to short-term exposure to air pollution

| Area            | Hospital admissions attributable to PM2.5 |             | Hospital admissions attributable to O3 |             |
|-----------------|-------------------------------------------|-------------|----------------------------------------|-------------|
|                 | Lower bound                               | Upper bound | Lower bound                            | Upper bound |
| DKI Jakarta     | 145                                       | 14,000      | 818                                    | 2,204       |
| Central Jakarta | 72                                        | 1,872       | 44                                     | 120         |
| North Jakarta   | 0*                                        | 2,242       | 50                                     | 155         |
| West Jakarta    | 19                                        | 3,429       | 243                                    | 628         |
| South Jakarta   | 0*                                        | 1,788       | 85                                     | 216         |
| East Jakarta    | 77                                        | 4,923       | 190                                    | 630         |

\* The zero value was due to uncertainty in the CI of the RR used in the estimation of health burdens (overlapping 1).

10

11

12

13

14 SUPPLEMENTARY 4 – District-specific economic burdens

15 For district-specific economic burdens, as shown in Table 4, we found that East Jakarta had the highest economic burdens attributable to air pollution in  
 16 comparison to its GRDP. Mortality burdens contributed to most of the total economic cost attributable to air pollution in each district.

17  
 18 Table S8. The yearly economic cost of health impact attributable to air pollution in DKI Jakarta (in million USD)

| District        | Health burdens attributable to air pollution |          |                         |           |                 | Economic burdens attributable to air pollution |          |                        |           |                 |                     |                            |
|-----------------|----------------------------------------------|----------|-------------------------|-----------|-----------------|------------------------------------------------|----------|------------------------|-----------|-----------------|---------------------|----------------------------|
|                 | Adverse Health Outcomes in Children          |          |                         | Mortality | Hospitalization | Adverse Health Outcomes in Children            |          |                        | Mortality | Hospitalization | Total economic cost | % to GRDP in each district |
|                 | Infant deaths                                | Stunting | Adverse birth outcomes* |           |                 | Infant deaths                                  | Stunting | Adverse birth outcomes |           |                 |                     |                            |
| Central Jakarta | 80                                           | 1,072    | 126                     | 1,127     | 719             | 22.73                                          | 0.14     | 0.19                   | 320.28    | 0.91            | 344.25              | 1%                         |
| North Jakarta   | 64                                           | 506      | 225                     | 1,456     | 568             | 18.19                                          | 0.06     | 0.34                   | 413.77    | 0.68            | 433.04              | 2%                         |
| West Jakarta    | 104                                          | 1,561    | 125                     | 2,397     | 1,264           | 29.56                                          | 0.20     | 0.04                   | 681.19    | 1.56            | 712.54              | 3%                         |
| South Jakarta   | 28                                           | 877      | 94                      | 2,301     | 476             | 7.96                                           | 0.11     | 0.14                   | 653.91    | 0.57            | 662.69              | 2%                         |
| East Jakarta    | 53                                           | 2,233    | 154                     | 2,721     | 1,472           | 15.06                                          | 0.29     | 0.22                   | 773.27    | 2.11            | 790.94              | 4%                         |

19 \* Combining newborns with low birth weight and preterm birth
